# Supplementary material
Source: HighWire-hosted journal article supplement (https://bmjopen.bmj.com/content/14/3/e080103)

**6a-Plots of SUCRA for the primary safety outcome (complications), the larger the area under the curve, the higher the ranking.**

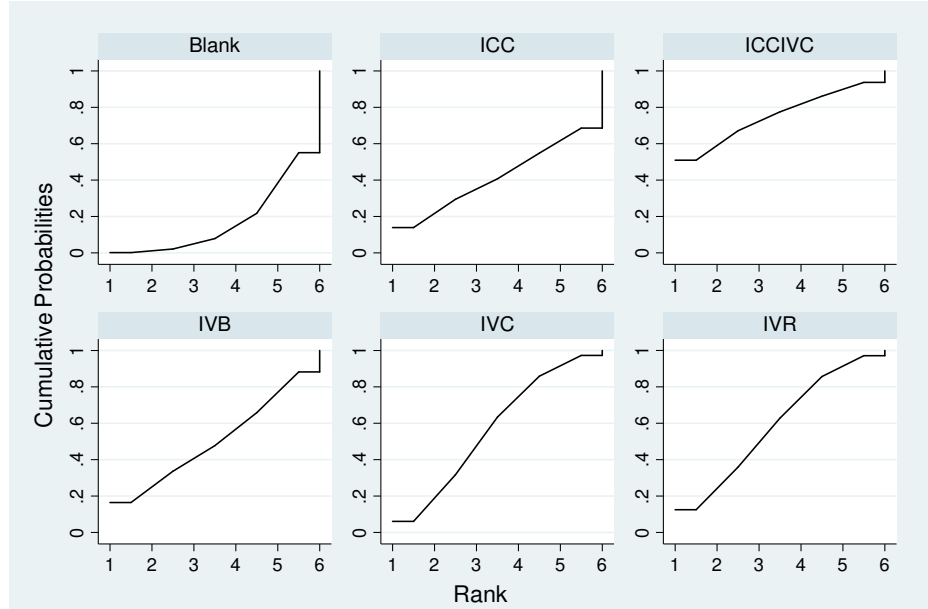

**6b-Comparison-adjusted funnel plot for the primary safety outcome (complications) from the network meta-analysis**

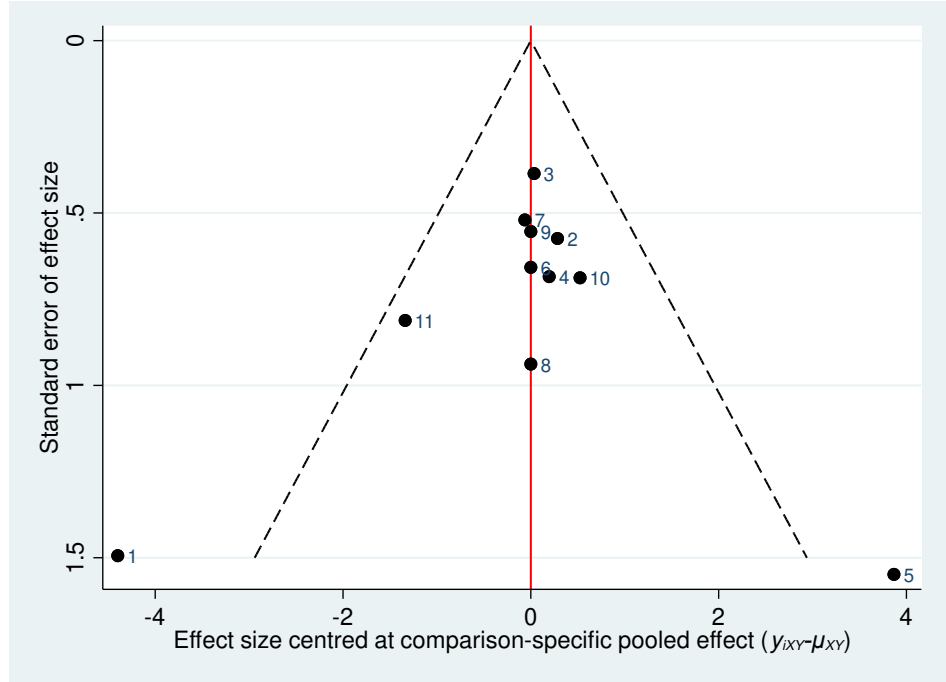

Supplement: inline-supplementary-material-6 [file inline-supplementary-material-6.pdf]
