# Supplementary material
Source: HighWire-hosted journal article supplement (https://bmjopen.bmj.com/content/14/3/e080103)
Supplement: inline-supplementary-material-9 [file inline-supplementary-material-9.pdf]

**9a-Plots of SUCRA for the secondary efficacy outcomes (IOP at 6 months), the larger the area under the curve, the higher the ranking.**

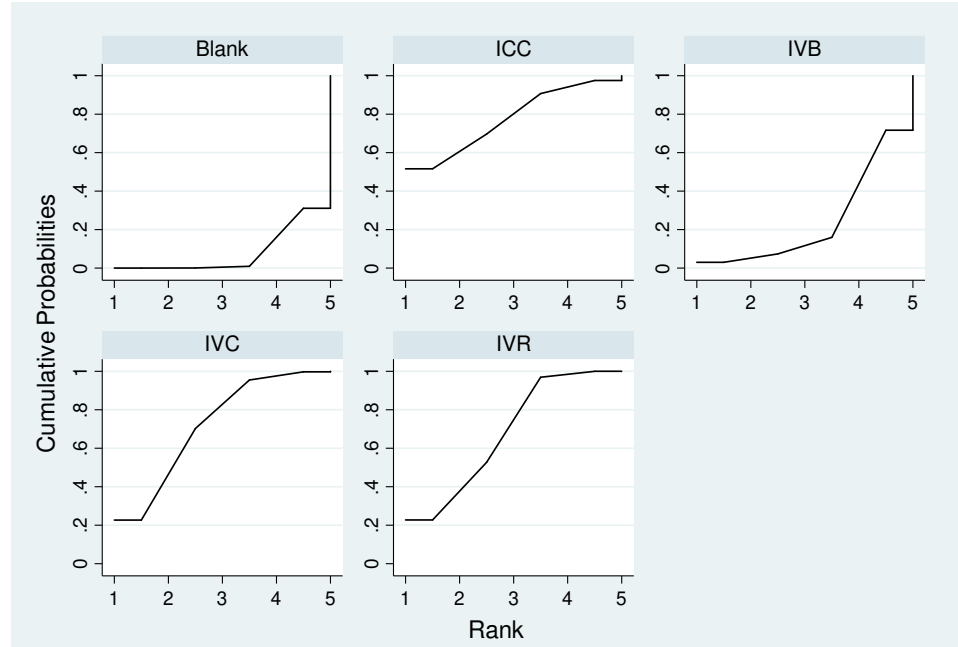

**9b-Comparison-adjusted funnel plot for the secondary efficacy outcomes (IOP at 6 months) from the network meta-analysis**

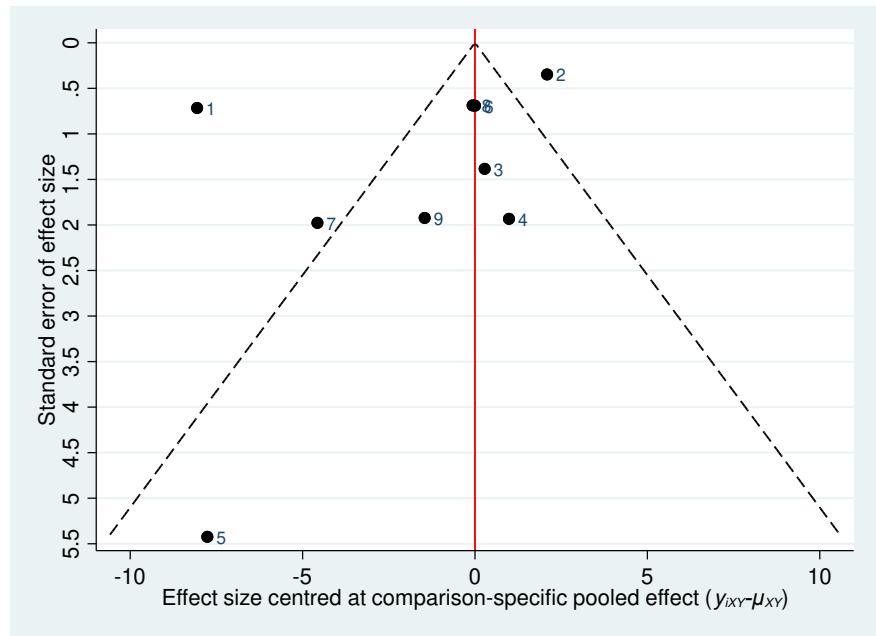

9c-Network plot of available treatment comparisons for the secondary efficacy outcomes (IOP at 6 months).

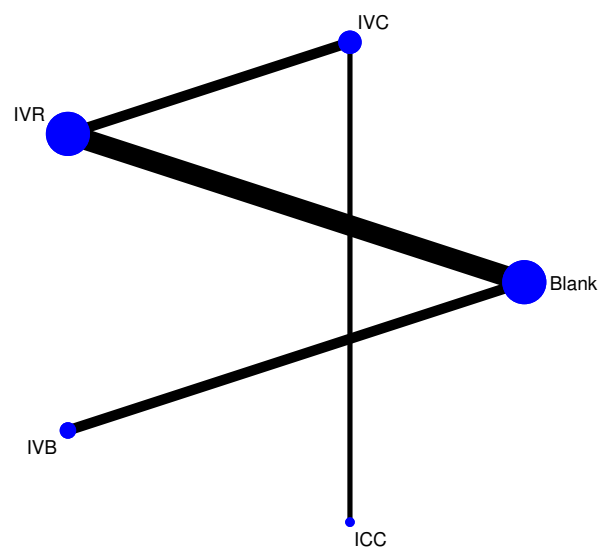

9d-The results of network meta-analysis for the secondary efficacy outcomes (IOP at 6 months).

| ICC                | -1.04(-2.39,0.31)  | NA                  | NA                | NA                  |
|--------------------|--------------------|---------------------|-------------------|---------------------|
| -1.02(-8.78,6.70)  | IVC                | 0.48(-0.73,1.69)    | NA                | NA                  |
| -1.59(-11.12,7.92) | 0.57(-4.99,6.14)   | IVR                 | NA                | -8.42(-14.86,-1.97) |
| -7.90(-20.2,4.76)  | 6.88(-3.08,16.58)  | 6.31(-1.95,14.30)   | IVB               | -2.46(-10.54,5.62)  |
| -9.95(-20.29,0.39) | -8.94(-15.8,-2.08) | -8.37(-12.42,-4.35) | -2.06(-9.25,4.90) | Blank               |
